# Supplementary material
Source: Elsevier journal article supplement (https://www.sciencedirect.com/science/article/pii/S0021755718301062)
Supplement: mmc1 [file S0021755718301062:mmc1.docx]

**JPED-2018-106 – Material Suplementar**

**Tabela suplementar 1 - MBFES/BRASIL.**

**Escala de Avaliação Materna da Amamentação – MBFES/Brasila**

Se já amamentou filhos anteriores, baseie as suas respostas na experiência mais recente/atual. Considere toda a experiência de amamentação e, por favor, responda a todas as perguntas. Indique se está de acordo ou desacordo colocando um círculo na resposta que considerar mais adequada para a sua situação.

|  | **Discordo totalmente** | **Discordo** | **Sem opinião** | **Concordo** | **Concordo totalmente** |
| --- | --- | --- | --- | --- | --- |
| 1. A amamentação deu-me satisfação interior | DT | D | SO | C | CT |
| 2. A amamentação proporcionou-me momentos especiais com o meu bebê. | DT | D | SO | C | CT |
| 3. O meu bebê não tinha qualquer interesse em mamar. | DT | D | SO | C | CT |
| 4. O meu bebê adorou mamar. | DT | D | SO | C | CT |
| 5. Para mim foi um fardo (pesado) ser a principal fonte de alimentação do meu bebê. | DT | D | SO | C | CT |
| 6. Senti-me extremamente ligada ao meu bebê quando o amamentei. | DT | D | SO | C | CT |
| 7. O meu bebê mamava avidamente (com muita vontade). | DT | D | SO | C | CT |
| 8. A amamentação foi fisicamente esgotante. | DT | D | SO | C | CT |
| 9. Para mim foi importante poder amamentar. | DT | D | SO | C | CT |
| 10. Durante a amamentação o crescimento do meu bebê foi excelente. | DT | D | SO | C | CT |
| 11. Eu e meu bebê trabalhamos em conjunto para que a amamentação ocorresse calmamente. | DT | D | SO | C | CT |
| 12. A amamentação foi uma experiência muito afetiva e maternal. | DT | D | SO | C | CT |
| 13. Enquanto amamentei senti constrangimento em relação ao meu corpo. | DT | D | SO | C | CT |
| 14. Enquanto amamentei senti-me demasiadamente presa todo o tempo. | DT | D | SO | C | CT |
| 15. Enquanto amamentei preocupei-me com o aumento de peso do meu bebê. | DT | D | SO | C | CT |
| 16. A amamentação acalmava o meu bebê quando ele estava aborrecido ou chorava. | DT | D | SO | C | CT |
| 17. A amamentação era como uma espécie de êxtase (realização). | DT | D | SO | C | CT |
| 18. O fato de poder produzir alimento para alimentar o meu bebê foi muito gratificante. | DT | D | SO | C | CT |
| 19. No princípio o meu bebê teve problemas com a amamentação. | DT | D | SO | C | CT |
| 20. A amamentação fez-me sentir uma boa mãe. | DT | D | SO | C | CT |
| 21. Gostei muito de amamentar. | DT | D | SO | C | CT |
| 22. Enquanto amamentei ansiava por retornar a minha forma física. | DT | D | SO | C | CT |
| 23. A amamentação fez-me sentir mais confiante como mãe. | DT | D | SO | C | CT |
| 24. O meu bebê desenvolveu-se muito bem com a amamentação. | DT | D | SO | C | CT |
| 25. A amamentação fez com que meu bebê se sentisse mais seguro. | DT | D | SO | C | CT |
| 26. Pude ajustar facilmente amamentação do meu bebê com as minhas outras atividades. | DT | D | SO | C | CT |
| 27. O meu bebê não relaxava enquanto mamava. | DT | D | SO | C | CT |
| 28. A amamentação foi emocionalmente desgastante. | DT | D | SO | C | CT |
| 29. A amamentação foi uma sensação maravilhosa para mim. | DT | D | SO | C | CT |

a Andrea F K de Senna, Camila Giugliani, Juliana C Avilla, Agnes M B L Bizon, Ana C M Martins, Ceres A V de Oliveira, Elsa R J Giugliani. Para permissão do uso deste instrumento entre em contato com Andrea Kroll de Senna.
